# Supplementary figures and images for: Locus Coeruleus Shows a Spatial Pattern of Structural Disintegration in Parkinson's Disease
Source: PubMed Central journal article supplement — Mov Disord. 2022 Feb 3;37(3):479–89. doi: 10.1002/mds.28945 (PMC9303353; doi:10.1002/mds.28945), 2022-02-03

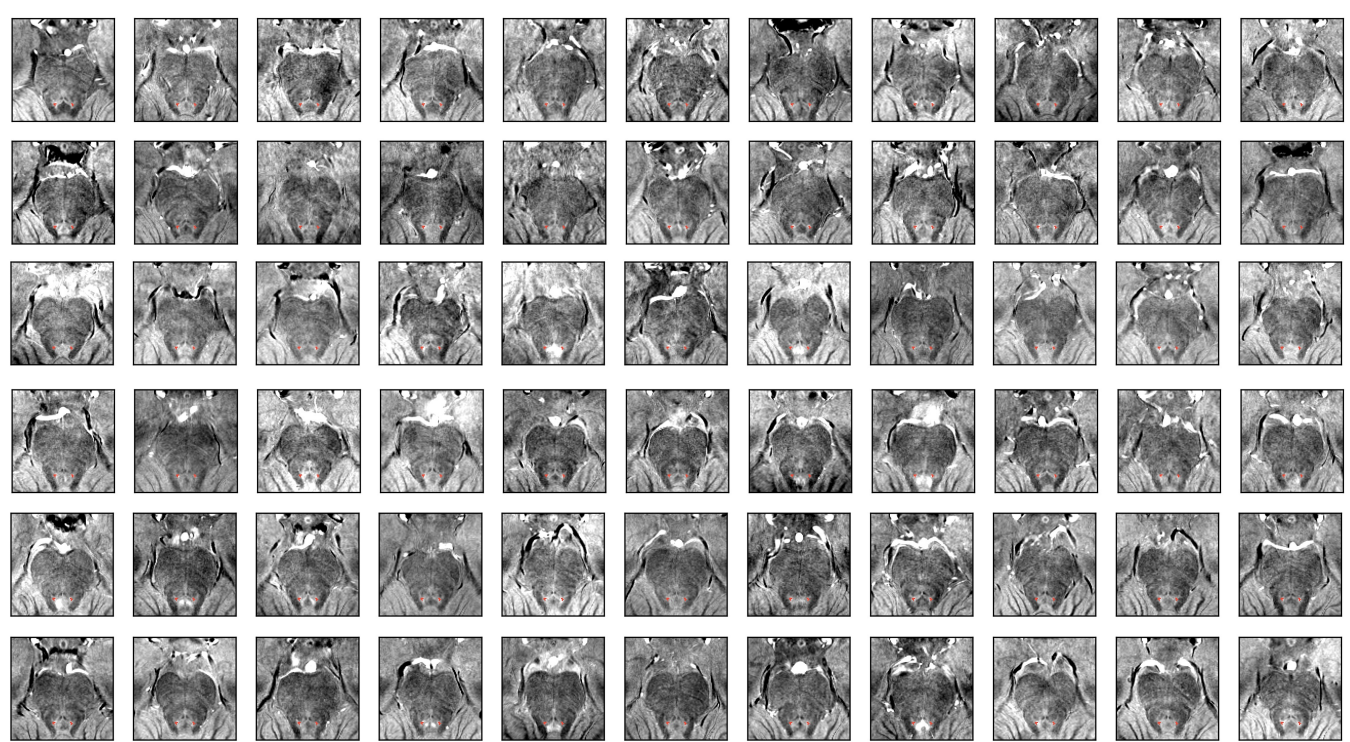

Supplement: MDS-37-479-s007.pdf [file MDS-37-479-s007.pdf]
